# Supplementary material for: Genetic Dynamic Analysis of the Influenza A H5N1 NS1 Gene in China
Source: PubMed Central journal article supplement (PMC4086889; doi:10.1371/journal.pone.0101384), 2014-07-08
Supplement: pone.0101384.s003.pdf [file pone.0101384.s003.pdf]

**Figure S3 Phylogenetic analysis of the NS1 gene based on 462 nucleotide sequences of HPAI H5N1 isolates. A small branch of the A allele contained the sequence AIASS at position 80-84 is highlighted in green.**

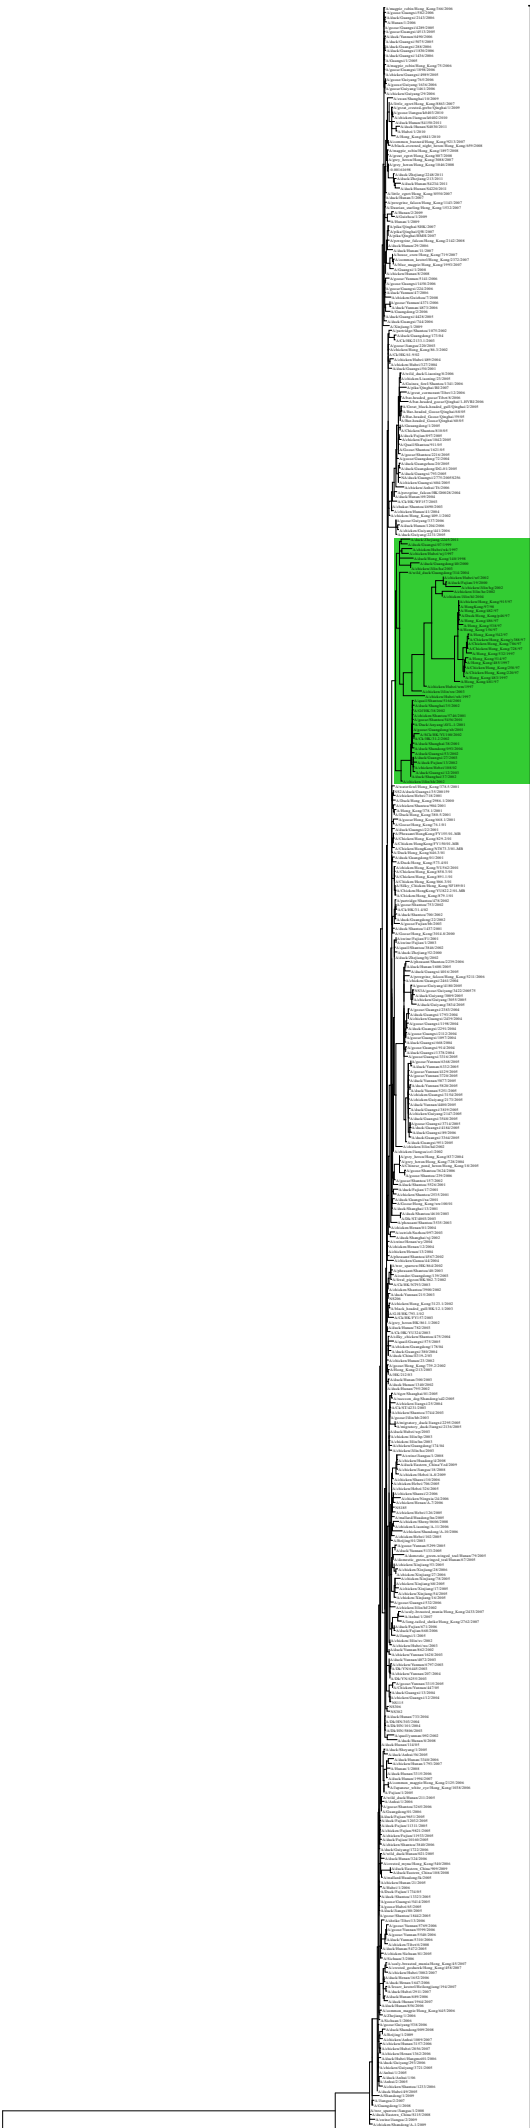

Allele A

Allele B
